# Supplementary material
Source: PubMed Central journal article supplement (PMC10687712)
Supplement: jama-e2324391-s003.pdf [file jama-e2324391-s003.pdf]

## Supplemental Online Content

Freund Y, Viglino D, Cachanado M, et al. Effect of noninvasive airway management of comatose patients with acute poisoning: a randomized clinical trial. *JAMA*. doi:10.1001/jama.2023.24391

**eTable 1.** Intubation difficulty score

**eTable 2.** Definition of pneumonia according to the US center of disease control

**eTable 3.** Calculation method of the hierarchical endpoint (Finkelstein-Schoenfeld method)

**eTable 4.** Intubation procedures

**eTable 5.** Secondary outcomes in the per protocol population

**eTable 6.** Characteristics of patients intubated in the control group

**eMethods.** *P* Value Calculation

This supplemental material has been provided by the authors to give readers additional information about their work.

|                                  | <b>Score</b>   |
|----------------------------------|----------------|
| Number of attempts > 1           | 1 <sup>a</sup> |
| Number of operators > 1          | 1 <sup>b</sup> |
| Number of alternative techniques | 1 <sup>c</sup> |
| Cormack-Lehan grade = 1          | 1              |
| Increased lifting force          | 1              |
| Laryngeal pressure               | 1              |
| Adduction of vocal cords         | 1              |

**eTable 1: Intubation difficulty score. Ranges From 0 to ∞. IDS > 5 indicates difficult intubation.**

a: 1 point for each additional attempt

b: 1 point for each additional operator

c: 1 point for each additional alternative technique. These include use of bougie, stylet, laryngeal mask, fibroscopy, change of blade or of laryngoscope.

**Two or more serial chest radiographs or computed tomography scans with at least one of the following** (one study is sufficient for patients with no underlying pulmonary or cardiac disease):

(i) New or progressive and persistent infiltrates, (ii) consolidation, (iii) cavitation AND at least one of the following:

- (a) fever ( $>38^{\circ}\text{C}$ ) with no other recognised cause,
- (b) leucopaenia (white cell count  $<4 \times 10^9$  litre $^{-1}$ ) or leucocytosis (white cell count  $>12 \times 10^9$  l $^{-1}$ ),
- (c) for adults  $>70$  year old, altered mental status with no other recognised cause;

**AND at least two of the following:**

- (a) new onset of purulent sputum or change in character of sputum, or increased respiratory secretions, or increased suctioning requirements,
- (b) new onset or worsening cough, or dyspnea, or tachypnoea,
- (c) rales or bronchial breath sounds,
- (d) worsening gas exchange (hypoxaemia, increased oxygen requirement, increased ventilator demand).

**eTable 2: Definition of pneumonia according to the US center of disease control.**

| In-hospital death for index patient | In-hospital death for comparison patient | ICU length of stay for index patient vs. comparison patient | Hospital length of stay for index patient vs. comparison patient | Points for index patient | Points for comparison patient |
|-------------------------------------|------------------------------------------|-------------------------------------------------------------|------------------------------------------------------------------|--------------------------|-------------------------------|
| Yes                                 | Yes                                      | Not used                                                    | Not used                                                         | 0 (tie)                  | 0 (tie)                       |
| No                                  | Yes                                      | Not used                                                    | Not used                                                         | +1 (win)                 | -1 (lose)                     |
| Yes                                 | No                                       | Not used                                                    | Not used                                                         | -1 (lose)                | +1 (win)                      |
| No                                  | No                                       | Shorter                                                     | Not used                                                         | +1 (win)                 | -1 (lose)                     |
| No                                  | No                                       | Longer                                                      | Not used                                                         | -1 (lose)                | +1 (win)                      |
| No                                  | No                                       | Same                                                        | Shorter                                                          | +1 (win)                 | -1 (lose)                     |
| No                                  | No                                       | Same                                                        | Longer                                                           | -1 (lose)                | +1 (win)                      |
| No                                  | No                                       | Same                                                        | Same                                                             | 0 (tie)                  | 0 (tie)                       |

**eTable 3: Calculation method of the hierarchical endpoint (Finkelstein-Schoenfeld method)**

| Variable                                                 | Intervention      | Control           |
|----------------------------------------------------------|-------------------|-------------------|
|                                                          | n=19              | n=63              |
| <b>Site of intubation - no. (%)</b>                      |                   |                   |
| Prehospital                                              | 4 (21.1)          | 28 (44.4)         |
| Emergency department                                     | 5 (26.3)          | 24 (38.1)         |
| Intensive care unit                                      | 10 (52.6)         | 11 (17.5)         |
| <b>Cause for intubation - no. (%)<sup>a</sup></b>        |                   |                   |
| Routine practice                                         | 3 (15.8)          | 58 (92.1)         |
| Acute respiratory distress                               | 13 (68.4)         | 4 (6.3)           |
| Vomiting                                                 | 4 (21.1)          | 1 (1.6)           |
| Seizure                                                  | 0 (0.0)           | 0 (0.0)           |
| Shock                                                    | 0 (0.0)           | 0 (0.0)           |
| <b>Median IDS score (points)</b>                         | 3 (2-3)           | 3 (2-5)           |
| <b>Number of attempts - no. (%)</b>                      | N=16              | N=61              |
| 1                                                        | 15 (93.8)         | 47 (77.0)         |
| 2                                                        | 1 (6.3)           | 8 (13.1)          |
| 3                                                        | 0 (0.0)           | 5 (8.2)           |
| 4                                                        | 0 (0.0)           | 1 (1.6)           |
| <b>Number of operators – no. (%)</b>                     | N=16              | N=62              |
| 1                                                        | 16 (100)          | 52 (83.9)         |
| 2                                                        | 0 (0.0)           | 9 (14.5)          |
| 3                                                        | 0 (0.0)           | 1 (1.6)           |
| <b>Cormack-Lehan score - no. (%)</b>                     | N=17              | N=61              |
| 0 (Grade I)                                              | 14 (82.4)         | 34 (55.7)         |
| 1 (Grade II)                                             | 3 (17.6)          | 19 (31.1)         |
| 2 (Grade III)                                            | 0 (0)             | 7 (11.5)          |
| 3 (Grade IV)                                             | 0 (0)             | 1 (1.6)           |
| <b>Increased lifting force on laryngoscope - no. (%)</b> | 1 (6.3)           | 17 (28.3)         |
| <b>Laryngeal external pressure - no. (%)</b>             | 4 (25.0)          | 22 (37.3)         |
| <b>Vocal cords open</b>                                  | N=16<br>14 (87.5) | N=59<br>49 (83.1) |
| <b>Number of alternative technics - no. (%)</b>          | N=16              | N=61              |
| 0                                                        | 15 (93.8)         | 48 (78.7)         |
| 1                                                        | 1 (6.3)           | 9 (14.8)          |
| 2                                                        | 0 (0.0)           | 2 (3.3)           |
| 3                                                        | 0 (0.0)           | 2 (3.3)           |

**eTable 4: Intubation procedures.**

**IDS: intubation difficulty score**

<sup>a</sup> One patient from the intervention group presented both vomiting and respiratory distress and 2 patients from the intervention group presented

| Outcome                                                 | Intervention<br>N=112 | Control<br>N=107     | Odds Ratio (95% CI) | Rate ratio (95% CI) | Difference (95% CI) <sup>a</sup> |
|---------------------------------------------------------|-----------------------|----------------------|---------------------|---------------------|----------------------------------|
| In-hospital death - no (%)                              | 0 (0.0)               | 0 (0.0)              | NC <sup>b</sup>     |                     | NC <sup>b</sup>                  |
| Intensive care unit admission - no (%)                  | 43 (38.4)             | 70 (65.4)            | 0.23 (0.12 to 0.44) |                     | -29.7% (-41.6% to -17.7%)        |
| Median length of intensive care unit stay (IQR) - hours | 0 [0 ; 19]            | 24 [0 ; 57]          |                     | 0.37 (0.22 to 0.63) |                                  |
| Median length of hospital stay (IQR) - hours            | 21 [10 ; 44]          | 40 [15 ; 91]         |                     | 0.71 (0.50 to 1.00) |                                  |
| Mechanical ventilation - no. (%)                        | 18 (16.1)             | 63 (58.9)            | 0.11 (0.05 to 0.22) |                     | -43.4% (-55.1% to -31.7%)        |
| Median length of mechanical ventilation (IQR) - hours   | 0 [0 ; 0]             | 6 [0 ; 21]           |                     | 0.18 (0.09 to 0.34) |                                  |
| Occurrence of pneumonia - no. (%)                       | 6 (5.4)               | 16 (15.0)            | 0.32 (0.12 to 0.86) |                     | -9.6% (-17.5% to -1.7%)          |
| Adverse event from intubation - no (%)                  | 6 (5.4)               | 16 (15.0)            | 0.32 (0.12 to 0.86) |                     | -9.6% (-17.5% to -1.7%)          |
| Peripheral oxygen saturation < 90% - no. (%)            | 2 (33.3)              | 4 (25.0)             |                     |                     |                                  |
| Dental trauma - no. (%)                                 | 0 (0.0)               | 2 (12.5)             |                     |                     |                                  |
| Vomiting - no. (%)                                      | 2 (33.3)              | 0 (0.0)              |                     |                     |                                  |
| Cardiac arrest - no. (%)                                | 0 (0.0)               | 0 (0.0)              |                     |                     |                                  |
| Difficult intubation with IDS ≥ 5 - no. (%)             | 1 (20.0)              | 14 (87.5)            |                     |                     |                                  |
| Systolic blood pressure < 90 mmHg - no. (%)             | 2 (33.3)              | 4 (25.0)             |                     |                     |                                  |
| Esophageal intubation - no. (%)                         | (0.0)                 | 4 (25.0)             |                     |                     |                                  |
| <b>First pass failure</b>                               | (n=109)<br>1 (0.9)    | (n=105)<br>14 (13.3) | 0.06 (0.01 à 0.47)  |                     | -12.4% (-19.2% à -5.7%)          |

**eTable 5: Secondary outcomes in the per protocol population**

All outcomes were truncated at 28 days.

<sup>a</sup> Differences were computed with a generalized mixed linear model with the center as random effect.

<sup>b</sup> Not calculated

| Variable                                          | Intubation<br>n=63 (57.8%) |              | No intubation<br>n=46 (42.3%) |              |
|---------------------------------------------------|----------------------------|--------------|-------------------------------|--------------|
| <b>Sex</b>                                        |                            |              |                               |              |
| Male                                              | 35 (55.6)                  |              | 35 (76.1)                     |              |
| Female                                            | 28 (44.4)                  |              | 11 (23.9)                     |              |
| <b>Median age (IQR)</b>                           | 38 (289 - 55)              |              | 32 (23 - 42)                  |              |
| <b>Site of inclusion</b>                          |                            |              |                               |              |
| Prehospital                                       | 31 (49)                    |              | 11 (24)                       |              |
| Emergency Department                              | 31 (49)                    |              | 35 (76)                       |              |
| Intensive Care Unit                               | 1 (2)                      |              | 0 (0)                         |              |
| <b>Heart rate – per min</b>                       | N=62                       | 86 (22)      | N=45                          | 84 (18)      |
| Heart rate > 100 – no. (%)                        | 11 (17.7)                  |              | 9 (20.0)                      |              |
| <b>Systolic blood pressure (mmHg)</b>             | N=62                       | 117.2 (19.7) | N=44                          | 118.9 (17.9) |
| Systolic blood pressure ≤ 100 (mmHg)              | 11 (17.7)                  |              | 7 (15.9)                      |              |
| <b>Diastolic blood pressure (mmHg)</b>            | N=62                       | 70.6 (14.9)  | N=45                          | 70.7 (13.4)  |
| <b>Respiratory rate – per min</b>                 | N=38                       | 16.9 (4.6)   | N=34                          | 16.8 (4.2)   |
| Respiratory rate ≤ 12 per min – no. (%)           | 6 (15.8)                   |              | 4 (11.8)                      |              |
| <b>Median peripheral oxygen saturation (%)</b>    | N=62                       | 98 (96- 100) | N=45                          | 97 (95-99)   |
| Median peripheral oxygen saturation < 95% -no (%) | 8 (12.9)                   |              | 9 (20.0)                      |              |
| <b>Median Glasgow coma scale core</b>             | 6 (3-7)                    |              | 7 (6-7)                       |              |
| <b>Toxin - n (%)</b>                              |                            |              |                               |              |
| Alcohol                                           | 37 (58.7)                  |              | 34 (73.9)                     |              |
| Benzodiazepin                                     | 30 (47.6)                  |              | 12 (26.1)                     |              |
| Neuroleptic                                       | 21 (33.3)                  |              | 6 (13.0)                      |              |
| Tricyclic antidepressant                          | 8 (12.7)                   |              | 1 (2.2)                       |              |
| Opioid / heroïne                                  | 5 (7.9)                    |              | 3 (6.5)                       |              |
| Crack / Cocaïne                                   | 4 (6.3)                    |              | 2 (4.3)                       |              |
| Amphétamines                                      | 5 (7.9)                    |              | 4 (8.7)                       |              |
| GHB / GBL                                         | 7 (11.1)                   |              | 4 (8.7)                       |              |
| Other                                             | 36 (57.1)                  |              | 18 (39.1)                     |              |

**eTable 6: Characteristics of patients intubated in the control group**  
GHB: gamma-hydroxybutyric acid. GBL: gamma-butyrolactone

**eMethods. P Value Calculation**

$p - \text{value} = 2 * \left[ 1 - \phi \left( \left| \frac{\log(\text{WS})}{\hat{\sigma}_{\log(\text{WS})}} \right| \right) \right]$  where  $\phi$  is the cumulative distribution function of the standard normal distribution (WS corresponds to win statistic and is equal to WR or WO, depending of the presented result).
