# Supplementary material
Source: PubMed Central journal article supplement (PMC10687712)
Supplement: jama-e2324391-s004.pdf [file jama-e2324391-s004.pdf]

## Data Sharing Statement

Freund. Effect of Noninvasive Airway Management of Comatose Patients With Acute Poisoning. *JAMA*. Published November 29, 2023. doi:10.1001/jama.2023.24391

### Data

**Data available:** Yes

**Data types:** Deidentified participant data

**How to access data:** data request shall be sent to [Tabassome.simon@aphp.fr](mailto:Tabassome.simon@aphp.fr)

**When available:** With publication

### Supporting Documents

**Document types:** Statistical/analytic code, Informed consent form

**How to access documents:** request shall be sent to [Tabassome.simon@aphp.fr](mailto:Tabassome.simon@aphp.fr)

**When available:** With publication

### Additional Information

**Who can access the data:** researchers whose proposed use of the data has been approved by the steering committee

**Types of analyses:** Any purpose

**Mechanisms of data availability:** after approval by the steering committee and signed data sharing agreement
